# Supplementary material
Source: publisher figshare collection journal article supplement (https://acs.figshare.com/ndownloader/files/12171086)
Supplement: Supplementary file 1 [file 12171086]

Archive with 4 entries (4 files):
- info.xml
- jz8b00373_high_quality.mp4
- jz8b00373.pdf
- Licenses_Obtained_Ref_CF2018.pdf
