# Supplementary material
Source: publisher figshare collection journal article supplement (https://acs.figshare.com/ndownloader/files/12171086)
Supplement: Supplementary file 1 [file 12171086 › info.xml]

<presentation>
	<article>
		<title>Capturing Structural Snapshots During Photochemical Reactions with Ultrafast Raman Spectroscopy: From Materials Transformation to Biosensor Responses</title>
		<doi>10.1021/acs.jpclett.8b00373</doi>
		<copyright>American Chemical Society</copyright>
		<narrator>Cheng Chen</narrator>
		<contact>Chong Fang</contact>
		<contact-email>Chong.Fang@oregonstate.edu</contact-email>
		<author-list>
			<author>Chong Fang</author>
		</author-list>
	</article>
	<slides height-width-ratio=".75">
		<slide audio-time="35">
			<subtitle/>
		</slide>
		<slide audio-time="68">
			<subtitle/>
		</slide>
		<slide audio-time="46">
			<subtitle/>
		</slide>
		<slide audio-time="63">
			<subtitle/>
		</slide>
		<slide audio-time="82">
			<subtitle/>
		</slide>
		<slide audio-time="77">
			<subtitle/>
		</slide>
		<slide audio-time="60">
			<subtitle/>
		</slide>
		<slide audio-time="72">
			<subtitle/>
		</slide>
	</slides>
	<audio duration="503"/>
</presentation>
