# Supplementary material
Source: publisher figshare collection journal article supplement (https://acs.figshare.com/ndownloader/files/12171086)
Supplement: Supplementary file 1 [file 12171086 › Licenses_Obtained_Ref_CF2018.pdf]

**AIP PUBLISHING LICENSE  
TERMS AND CONDITIONS**

Jun 01, 2018

---

This Agreement between Chong Fang ("You") and AIP Publishing ("AIP Publishing") consists of your license details and the terms and conditions provided by AIP Publishing and Copyright Clearance Center.

|                                          |                                                                                                                                                       |
|------------------------------------------|-------------------------------------------------------------------------------------------------------------------------------------------------------|
| License Number                           | 4360021417446                                                                                                                                         |
| License date                             | Jun 01, 2018                                                                                                                                          |
| Licensed Content Publisher               | AIP Publishing                                                                                                                                        |
| Licensed Content Publication             | Applied Physics Letters                                                                                                                               |
| Licensed Content Title                   | Tunable sideband laser from cascaded four-wave mixing in thin glass for ultra-broadband femtosecond stimulated Raman spectroscopy                     |
| Licensed Content Author                  | Liangdong Zhu, Weimin Liu, Chong Fang                                                                                                                 |
| Licensed Content Date                    | Aug 5, 2013                                                                                                                                           |
| Licensed Content Volume                  | 103                                                                                                                                                   |
| Licensed Content Issue                   | 6                                                                                                                                                     |
| Type of Use                              | Journal/Magazine                                                                                                                                      |
| Requestor type                           | Author (original article)                                                                                                                             |
| Format                                   | Electronic                                                                                                                                            |
| Portion                                  | Figure/Table                                                                                                                                          |
| Number of figures/tables                 | 1                                                                                                                                                     |
| Title of new article                     | Capturing Structural Snapshots During Photochemical Reactions with Ultrafast Raman Spectroscopy: From Materials Transformation to Biosensor Responses |
| Publication the new article is in        | The Journal of Physical Chemistry Letters                                                                                                             |
| Publisher of new article                 | American Chemical Society                                                                                                                             |
| Author of new article                    | Chong Fang, Longteng Tang, Breland G. Oscar, and Cheng Chen                                                                                           |
| Expected publication date of new article | Jun 2018                                                                                                                                              |
| Estimated size of new article (pages)    | 11                                                                                                                                                    |
| Requestor Location                       | Chong Fang<br>153 Gilbert Hall Dept of Chemistry<br>Oregon State University<br><br>CORVALLIS, OR 97331<br>United States<br>Attn: Chong Fang           |

|                 |                                                                                                                                             |
|-----------------|---------------------------------------------------------------------------------------------------------------------------------------------|
| Billing Type    | Invoice                                                                                                                                     |
| Billing Address | Chong Fang<br>153 Gilbert Hall Dept of Chemistry<br>Oregon State University<br><br>CORVALLIS, OR 97331<br>United States<br>Attn: Chong Fang |
| Total           | 0.00 USD                                                                                                                                    |

### Terms and Conditions

#### AIP Publishing -- Terms and Conditions: Permissions Uses

AIP Publishing hereby grants to you the non-exclusive right and license to use and/or distribute the Material according to the use specified in your order, on a one-time basis, for the specified term, with a maximum distribution equal to the number that you have ordered. Any links or other content accompanying the Material are not the subject of this license.

1. You agree to include the following copyright and permission notice with the reproduction of the Material: "Reprinted from [FULL CITATION], with the permission of AIP Publishing." For an article, the credit line and permission notice must be printed on the first page of the article or book chapter. For photographs, covers, or tables, the notice may appear with the Material, in a footnote, or in the reference list.
2. If you have licensed reuse of a figure, photograph, cover, or table, it is your responsibility to ensure that the material is original to AIP Publishing and does not contain the copyright of another entity, and that the copyright notice of the figure, photograph, cover, or table does not indicate that it was reprinted by AIP Publishing, with permission, from another source. Under no circumstances does AIP Publishing purport or intend to grant permission to reuse material to which it does not hold appropriate rights.  
You may not alter or modify the Material in any manner. You may translate the Material into another language only if you have licensed translation rights. You may not use the Material for promotional purposes.
3. The foregoing license shall not take effect unless and until AIP Publishing or its agent, Copyright Clearance Center, receives the Payment in accordance with Copyright Clearance Center Billing and Payment Terms and Conditions, which are incorporated herein by reference.
4. AIP Publishing or Copyright Clearance Center may, within two business days of granting this license, revoke the license for any reason whatsoever, with a full refund payable to you. Should you violate the terms of this license at any time, AIP Publishing, or Copyright Clearance Center may revoke the license with no refund to you. Notice of such revocation will be made using the contact information provided by you. Failure to receive such notice will not nullify the revocation.
5. AIP Publishing makes no representations or warranties with respect to the Material. You agree to indemnify and hold harmless AIP Publishing, and their officers, directors, employees or agents from and against any and all claims arising out of your use of the Material other than as specifically authorized herein.
6. The permission granted herein is personal to you and is not transferable or assignable without the prior written permission of AIP Publishing. This license may not be amended except in a writing signed by the party to be charged.
7. If purchase orders, acknowledgments or check endorsements are issued on any forms containing terms and conditions which are inconsistent with these provisions, such inconsistent terms and conditions shall be of no force and effect. This document, including the CCC Billing and Payment Terms and Conditions, shall be the entire agreement between the parties relating to the subject matter hereof.

This Agreement shall be governed by and construed in accordance with the laws of the State

of New York. Both parties hereby submit to the jurisdiction of the courts of New York County for purposes of resolving any disputes that may arise hereunder.

V1.2

**Questions? [customercare@copyright.com](mailto:customercare@copyright.com) or +1-855-239-3415 (toll free in the US) or +1-978-646-2777.**

---

---

**AIP PUBLISHING LICENSE  
TERMS AND CONDITIONS**

Jun 01, 2018

---

This Agreement between Chong Fang ("You") and AIP Publishing ("AIP Publishing") consists of your license details and the terms and conditions provided by AIP Publishing and Copyright Clearance Center.

|                                          |                                                                                                                                                       |
|------------------------------------------|-------------------------------------------------------------------------------------------------------------------------------------------------------|
| License Number                           | 4360030131256                                                                                                                                         |
| License date                             | Jun 01, 2018                                                                                                                                          |
| Licensed Content Publisher               | AIP Publishing                                                                                                                                        |
| Licensed Content Publication             | Applied Physics Letters                                                                                                                               |
| Licensed Content Title                   | Simultaneous solution-based generation and characterization of crystalline bismuth thin film by femtosecond laser spectroscopy                        |
| Licensed Content Author                  | Liangdong Zhu, Sumit Saha, Weimin Liu, et al                                                                                                          |
| Licensed Content Date                    | Aug 10, 2015                                                                                                                                          |
| Licensed Content Volume                  | 107                                                                                                                                                   |
| Licensed Content Issue                   | 6                                                                                                                                                     |
| Type of Use                              | Journal/Magazine                                                                                                                                      |
| Requestor type                           | Author (original article)                                                                                                                             |
| Format                                   | Electronic                                                                                                                                            |
| Portion                                  | Figure/Table                                                                                                                                          |
| Number of figures/tables                 | 1                                                                                                                                                     |
| Title of new article                     | Capturing Structural Snapshots During Photochemical Reactions with Ultrafast Raman Spectroscopy: From Materials Transformation to Biosensor Responses |
| Publication the new article is in        | The Journal of Physical Chemistry Letters                                                                                                             |
| Publisher of new article                 | American Chemical Society                                                                                                                             |
| Author of new article                    | Chong Fang, Longteng Tang, Breland G. Oscar, and Cheng Chen                                                                                           |
| Expected publication date of new article | Jun 2018                                                                                                                                              |
| Estimated size of new article (pages)    | 11                                                                                                                                                    |
| Requestor Location                       | Chong Fang<br>153 Gilbert Hall Dept of Chemistry<br>Oregon State University<br><br>CORVALLIS, OR 97331<br>United States<br>Attn: Chong Fang           |

|                 |                                                                                                                                             |
|-----------------|---------------------------------------------------------------------------------------------------------------------------------------------|
| Billing Type    | Invoice                                                                                                                                     |
| Billing Address | Chong Fang<br>153 Gilbert Hall Dept of Chemistry<br>Oregon State University<br><br>CORVALLIS, OR 97331<br>United States<br>Attn: Chong Fang |
| Total           | 0.00 USD                                                                                                                                    |

### Terms and Conditions

#### AIP Publishing -- Terms and Conditions: Permissions Uses

AIP Publishing hereby grants to you the non-exclusive right and license to use and/or distribute the Material according to the use specified in your order, on a one-time basis, for the specified term, with a maximum distribution equal to the number that you have ordered. Any links or other content accompanying the Material are not the subject of this license.

1. You agree to include the following copyright and permission notice with the reproduction of the Material: "Reprinted from [FULL CITATION], with the permission of AIP Publishing." For an article, the credit line and permission notice must be printed on the first page of the article or book chapter. For photographs, covers, or tables, the notice may appear with the Material, in a footnote, or in the reference list.
2. If you have licensed reuse of a figure, photograph, cover, or table, it is your responsibility to ensure that the material is original to AIP Publishing and does not contain the copyright of another entity, and that the copyright notice of the figure, photograph, cover, or table does not indicate that it was reprinted by AIP Publishing, with permission, from another source. Under no circumstances does AIP Publishing purport or intend to grant permission to reuse material to which it does not hold appropriate rights.  
You may not alter or modify the Material in any manner. You may translate the Material into another language only if you have licensed translation rights. You may not use the Material for promotional purposes.
3. The foregoing license shall not take effect unless and until AIP Publishing or its agent, Copyright Clearance Center, receives the Payment in accordance with Copyright Clearance Center Billing and Payment Terms and Conditions, which are incorporated herein by reference.
4. AIP Publishing or Copyright Clearance Center may, within two business days of granting this license, revoke the license for any reason whatsoever, with a full refund payable to you. Should you violate the terms of this license at any time, AIP Publishing, or Copyright Clearance Center may revoke the license with no refund to you. Notice of such revocation will be made using the contact information provided by you. Failure to receive such notice will not nullify the revocation.
5. AIP Publishing makes no representations or warranties with respect to the Material. You agree to indemnify and hold harmless AIP Publishing, and their officers, directors, employees or agents from and against any and all claims arising out of your use of the Material other than as specifically authorized herein.
6. The permission granted herein is personal to you and is not transferable or assignable without the prior written permission of AIP Publishing. This license may not be amended except in a writing signed by the party to be charged.
7. If purchase orders, acknowledgments or check endorsements are issued on any forms containing terms and conditions which are inconsistent with these provisions, such inconsistent terms and conditions shall be of no force and effect. This document, including the CCC Billing and Payment Terms and Conditions, shall be the entire agreement between the parties relating to the subject matter hereof.

This Agreement shall be governed by and construed in accordance with the laws of the State

of New York. Both parties hereby submit to the jurisdiction of the courts of New York County for purposes of resolving any disputes that may arise hereunder.

V1.2

**Questions? [customercare@copyright.com](mailto:customercare@copyright.com) or +1-855-239-3415 (toll free in the US) or +1-978-646-2777.**

---

---

**AIP PUBLISHING LICENSE  
TERMS AND CONDITIONS**

Jun 01, 2018

---

This Agreement between Chong Fang ("You") and AIP Publishing ("AIP Publishing") consists of your license details and the terms and conditions provided by AIP Publishing and Copyright Clearance Center.

|                                          |                                                                                                                                                       |
|------------------------------------------|-------------------------------------------------------------------------------------------------------------------------------------------------------|
| License Number                           | 4360030444144                                                                                                                                         |
| License date                             | Jun 01, 2018                                                                                                                                          |
| Licensed Content Publisher               | AIP Publishing                                                                                                                                        |
| Licensed Content Publication             | Applied Physics Letters                                                                                                                               |
| Licensed Content Title                   | A versatile femtosecond stimulated Raman spectroscopy setup with tunable pulses in the visible to near infrared                                       |
| Licensed Content Author                  | Liangdong Zhu, Weimin Liu, Chong Fang                                                                                                                 |
| Licensed Content Date                    | Jul 28, 2014                                                                                                                                          |
| Licensed Content Volume                  | 105                                                                                                                                                   |
| Licensed Content Issue                   | 4                                                                                                                                                     |
| Type of Use                              | Journal/Magazine                                                                                                                                      |
| Requestor type                           | Publisher                                                                                                                                             |
| Format                                   | Electronic                                                                                                                                            |
| Portion                                  | Figure/Table                                                                                                                                          |
| Number of figures/tables                 | 1                                                                                                                                                     |
| Title of new article                     | Capturing Structural Snapshots During Photochemical Reactions with Ultrafast Raman Spectroscopy: From Materials Transformation to Biosensor Responses |
| Publication the new article is in        | The Journal of Physical Chemistry Letters                                                                                                             |
| Publisher of new article                 | American Chemical Society                                                                                                                             |
| Author of new article                    | Chong Fang, Longteng Tang, Breland G. Oscar, and Cheng Chen                                                                                           |
| Expected publication date of new article | Jun 2018                                                                                                                                              |
| Estimated size of new article (pages)    | 11                                                                                                                                                    |
| Requestor Location                       | Chong Fang<br>153 Gilbert Hall Dept of Chemistry<br>Oregon State University<br><br>CORVALLIS, OR 97331<br>United States<br>Attn: Chong Fang           |

|                 |                                                                                                                                             |
|-----------------|---------------------------------------------------------------------------------------------------------------------------------------------|
| Billing Type    | Invoice                                                                                                                                     |
| Billing Address | Chong Fang<br>153 Gilbert Hall Dept of Chemistry<br>Oregon State University<br><br>CORVALLIS, OR 97331<br>United States<br>Attn: Chong Fang |
| Total           | 0.00 USD                                                                                                                                    |

### Terms and Conditions

#### AIP Publishing -- Terms and Conditions: Permissions Uses

AIP Publishing hereby grants to you the non-exclusive right and license to use and/or distribute the Material according to the use specified in your order, on a one-time basis, for the specified term, with a maximum distribution equal to the number that you have ordered. Any links or other content accompanying the Material are not the subject of this license.

1. You agree to include the following copyright and permission notice with the reproduction of the Material: "Reprinted from [FULL CITATION], with the permission of AIP Publishing." For an article, the credit line and permission notice must be printed on the first page of the article or book chapter. For photographs, covers, or tables, the notice may appear with the Material, in a footnote, or in the reference list.
2. If you have licensed reuse of a figure, photograph, cover, or table, it is your responsibility to ensure that the material is original to AIP Publishing and does not contain the copyright of another entity, and that the copyright notice of the figure, photograph, cover, or table does not indicate that it was reprinted by AIP Publishing, with permission, from another source. Under no circumstances does AIP Publishing purport or intend to grant permission to reuse material to which it does not hold appropriate rights.  
You may not alter or modify the Material in any manner. You may translate the Material into another language only if you have licensed translation rights. You may not use the Material for promotional purposes.
3. The foregoing license shall not take effect unless and until AIP Publishing or its agent, Copyright Clearance Center, receives the Payment in accordance with Copyright Clearance Center Billing and Payment Terms and Conditions, which are incorporated herein by reference.
4. AIP Publishing or Copyright Clearance Center may, within two business days of granting this license, revoke the license for any reason whatsoever, with a full refund payable to you. Should you violate the terms of this license at any time, AIP Publishing, or Copyright Clearance Center may revoke the license with no refund to you. Notice of such revocation will be made using the contact information provided by you. Failure to receive such notice will not nullify the revocation.
5. AIP Publishing makes no representations or warranties with respect to the Material. You agree to indemnify and hold harmless AIP Publishing, and their officers, directors, employees or agents from and against any and all claims arising out of your use of the Material other than as specifically authorized herein.
6. The permission granted herein is personal to you and is not transferable or assignable without the prior written permission of AIP Publishing. This license may not be amended except in a writing signed by the party to be charged.
7. If purchase orders, acknowledgments or check endorsements are issued on any forms containing terms and conditions which are inconsistent with these provisions, such inconsistent terms and conditions shall be of no force and effect. This document, including the CCC Billing and Payment Terms and Conditions, shall be the entire agreement between the parties relating to the subject matter hereof.

This Agreement shall be governed by and construed in accordance with the laws of the State

of New York. Both parties hereby submit to the jurisdiction of the courts of New York County for purposes of resolving any disputes that may arise hereunder.

V1.2

**Questions? [customercare@copyright.com](mailto:customercare@copyright.com) or +1-855-239-3415 (toll free in the US) or +1-978-646-2777.**

---

---

From: pubscopyright copyright@osa.org  
Subject: RE: Copyright permission request for reuse/reprint in a journal (Authors' own figures)  
Date: March 9, 2017 at 12:53 PM  
To: Fang, Chong Chong.Fang@oregonstate.edu, pubscopyright copyright@osa.org

P

Dear Dr. Chong Fang,

Thank you for contacting The Optical Society.

Because you are the author of the source paper from which you wish to reproduce material, OSA considers your requested use of its copyrighted materials to be permissible within the author rights granted in the Copyright Transfer Agreement submitted by the requester on acceptance for publication of his/her manuscript. It is requested that a complete citation of the original material be included in any publication. This permission assumes that the material was not reproduced from another source when published in the original publication.

Let me know if you have any questions.

Kind Regards,

Rebecca Robinson

Rebecca Robinson  
March 9, 2017  
Authorized Agent, The Optical Society

---

**From:** Fang, Chong [<mailto:Chong.Fang@oregonstate.edu>]  
**Sent:** Wednesday, March 08, 2017 7:44 PM  
**To:** pubscopyright  
**Subject:** Copyright permission request for reuse/reprint in a journal (Authors' own figures)  
**Importance:** High

Dear OSA,

This copyright permission request is for the following paper that we ourselves published in *Opt. Lett.*,

Weimin Liu, Liangdong Zhu, Liang Wang, and **Chong Fang** (2013) "Cascaded four-wave mixing for broadband tunable laser sideband generation", *Opt. Lett.*, **38** (11), 1772-1774. [DOC. ID 187244, posted 24 April 2013]. [DOI: 10.1364/OL.38.001772](https://doi.org/10.1364/OL.38.001772).

We will adapt **Figures 1 and 3 therein** as part of a composite figure in an upcoming invited journal (review) article from our group for *Accounts of Chemical Research* published by ACS Publications. We will include the full reference citation as well as the acknowledgement sentence "Copyright 2013 Optical Society of America" in the figure caption.

Thanks in advance for your prompt attention and confirmation of the permission/reprint license. My complete contact information can be found below.

Best wishes,

C. Fang

\*\*\*\*\*

DR. CHONG FANG

Associate Professor

153 Gilbert Hall

Department of Chemistry

Oregon State University

Corvallis, OR 97331

Tel: 541.737.6704

Web: <http://oregonstate.edu/colleges/chem/fang/>

\*\*\*\*\*

ABOUT (/SITE/ABOUTPNAS/INDEX.XHTML)

COLLECTED ARTICLES (/SITE/MISC/COLLECTEDPAPERS.XHTML)

BROWSE BY TOPIC (/SEARCH)

EARLY EDITION (/CONTENT/EARLY/RECENT)

FRONT MATTER (HTTP://FRONTMATTER.PNAS.ORG)

PNAS

# Rights and Permissions

About PNAS (/site/aboutpnas/index.xhtml#PNAS\_Online)

Free Content (/site/aboutpnas/index.xhtml#free)

Special Features (/site/aboutpnas/special.xhtml)

Colloquium Papers (/site/aboutpnas/colloquia.xhtml)

Article and Journal Metrics (/site/aboutpnas/metrics.xhtml)

Developing Countries With Free Access to PNAS Online (/site/aboutpnas/developingcountries.xhtml)

Marketing Brochure (/site/misc/pnasmarketingbrochure.pdf)

RSS Feeds (/site/aboutpnas/rss.xhtml)

About Direct Submission (/site/aboutpnas/submiss.xhtml)

Reprints (/site/aboutpnas/reprints.xhtml)

Rights and Permissions (/site/aboutpnas/rightperm.xhtml)

Author Rights and Permissions Frequently Asked Questions (/site/aboutpnas/rightpermfaq.xhtml)

Frequently Asked Questions (/site/aboutpnas/faq.xhtml)

PNAS Portals (/site/misc/pnas\_portals.xhtml)

PNAS Full-Text App (/site/misc/pnas\_mobile.xhtml)

Android App Permissions (/site)

Beginning with articles submitted in Volume 106 (2009) the author(s) retains copyright to individual articles, and the National Academy of Sciences of the United States of America retains an exclusive License to Publish (/site/misc/authorlicense.pdf) these articles and holds copyright to the collective work. Volumes 90–105 (1993–2008) copyright © National Academy of Sciences. For volumes 1–89 (1915–1992), the author(s) retains copyright to individual articles, and the National Academy of Sciences holds copyright to the collective work.

The PNAS listing on the Sherpa RoMEO publisher copyright policies and self-archiving detail pages can be found here (http://www.sherpa.ac.uk/romeo/search.php?id=94&la=en&flDnum=).

## Requests for Permission to Reprint Material Published in PNAS

Anyone may, without requesting permission, use original figures or tables published in PNAS for noncommercial and educational use (i.e., in a review article, in a book that is not for sale), provided that the full journal reference is cited and, for articles published in volumes 90–105 (1993–2008), "Copyright (copyright year) National Academy of Sciences." Commercial reuse of figures and tables (i.e., in promotional materials, in a textbook for sale) requires permission from PNAS.

PNAS authors need not obtain permission for the following cases: 1) to use their original figures or tables in their future works; 2) to make copies of their papers for their own personal use, including classroom use, or for the personal use of colleagues, provided those copies are not for sale and are not distributed in a systematic way; 3) to include their papers as part of their dissertations; or 4) to use all or part of their articles in printed compilations of their own works. The full journal reference must be cited and, for articles published in volumes 90–105 (1993–2008), "Copyright (copyright year) National Academy of Sciences."

For permission to reprint material in volumes 1–89 (1915–1992), requests should be sent to the original authors, who hold the copyright. The full journal reference must be cited.

For permission to reprint material in volumes 90–present (1993–present), requests should be sent via email to PNASPermissions@nas.edu (mailto:PNASPermissions@nas.edu) and must include the following information:

1. Your full name, affiliation, and title
2. Your complete mailing address, phone number, and email
3. PNAS volume number, issue number, and issue date
4. PNAS article title
5. PNAS authors' names
6. Page numbers of items to be reprinted
7. Figure/table number or portion of text to be reprinted

Requests must also include the following information about the intended use of the material:

1. Title of work in which PNAS material will appear
2. Authors/editors of work

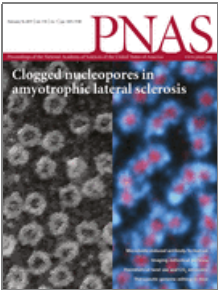

Current Issue (/content/current)

Email Alerts (/site/misc/PNASalerts.xhtml)

Subscribe (/site/subscriptions/index.xhtml)

RSS (/site/aboutpnas/rss.xhtml)

## Don't Miss

Thinking of submitting your next paper to PNAS? Learn tips in our PNAS tutorial videos (/site/authors/submit-how.xhtml).

## Other PNAS Media

Image Gallery (/site/media/imagegallery.xhtml)

Video Library (/site/media/videolibrary.xhtml)

Follow Us on Twitter (https://twitter.com/PNASNews)

Find Us on Facebook (http://www.facebook.com/pages/PNAS/18262365099)

MOST READ

MOST CITED

1. Imaging proteins at the single-molecule level (/cgi/content/short/pnas;1614519114v1?rss=1&ssource=mfr)
2. Selection against variants in the genome associated with educational attainment (/cgi/content/short/pnas;114/5/E727?rss=1&ssource=mfr)
3. Science and Culture: Solving a math problem to create art (/cgi/content/short/pnas;113/52/14873?rss=1&ssource=mfr)
4. On-demand high-capacity ride-sharing via dynamic trip-vehicle assignment

|                                                      |                                                                                                                                                                                                                                                                                                                                                                                                                                                                                                                                                                                                                                                                                                                                                                                                                                                                                                                                                                                                                                                                                                                                                                                                                                                     |                                                                                                                       |
|------------------------------------------------------|-----------------------------------------------------------------------------------------------------------------------------------------------------------------------------------------------------------------------------------------------------------------------------------------------------------------------------------------------------------------------------------------------------------------------------------------------------------------------------------------------------------------------------------------------------------------------------------------------------------------------------------------------------------------------------------------------------------------------------------------------------------------------------------------------------------------------------------------------------------------------------------------------------------------------------------------------------------------------------------------------------------------------------------------------------------------------------------------------------------------------------------------------------------------------------------------------------------------------------------------------------|-----------------------------------------------------------------------------------------------------------------------|
| PNAS Rights and Permissions (/misc/permissions.html) |                                                                                                                                                                                                                                                                                                                                                                                                                                                                                                                                                                                                                                                                                                                                                                                                                                                                                                                                                                                                                                                                                                                                                                                                                                                     | <a href="http://www.pnas.org/site/aboutpnas/rightperm.xhtml">http://www.pnas.org/site/aboutpnas/rightperm.xhtml</a>   |
| PNAS Alerts (/site/misc/PNASalerts.xhtml)            | 3. Publisher of work                                                                                                                                                                                                                                                                                                                                                                                                                                                                                                                                                                                                                                                                                                                                                                                                                                                                                                                                                                                                                                                                                                                                                                                                                                | <a href="http://www.pnas.org/cgi/content/short/pnas;114/3/462?rss=1&amp;ssource=mfr">/3/462?rss=1&amp;ssource=mfr</a> |
| Editorial Board (/site/misc/masthead.xhtml)          | 4. Retail price of work                                                                                                                                                                                                                                                                                                                                                                                                                                                                                                                                                                                                                                                                                                                                                                                                                                                                                                                                                                                                                                                                                                                                                                                                                             | 5. Content analysis of 150 years of British periodicals (/cgi/content/short/pnas;114/4/E457?rss=1&ssource=mfr)        |
| News & Multimedia (/multimedia)                      | 5. Number of copies of work to be produced                                                                                                                                                                                                                                                                                                                                                                                                                                                                                                                                                                                                                                                                                                                                                                                                                                                                                                                                                                                                                                                                                                                                                                                                          | <b>50 Most-Read Articles »</b> (/reports/most-read)                                                                   |
| Subscriptions (/site/subscriptions/index.xhtml)      | 6. Intended audience                                                                                                                                                                                                                                                                                                                                                                                                                                                                                                                                                                                                                                                                                                                                                                                                                                                                                                                                                                                                                                                                                                                                                                                                                                |                                                                                                                       |
| Contact (/site/misc/contact.xhtml)                   | 7. Whether work is for nonprofit or commercial use                                                                                                                                                                                                                                                                                                                                                                                                                                                                                                                                                                                                                                                                                                                                                                                                                                                                                                                                                                                                                                                                                                                                                                                                  |                                                                                                                       |
|                                                      | <p>Authors whose work will be reused should be notified. PNAS cannot supply original artwork. Use of PNAS material must not imply any endorsement by PNAS or the National Academy of Sciences. The full journal reference must be cited and, for articles published in volumes 90–105 (1993–2008), "Copyright (copyright year) National Academy of Sciences."</p> <p><b>Requests for Permission to Photocopy Material Published in PNAS</b></p> <p>For permission to photocopy beyond that permitted by Section 107 or 108 of the US Copyright Law (<a href="http://www.copyright.gov/title17/92chap1.html#107">http://www.copyright.gov/title17/92chap1.html#107</a>), contact:</p> <p>Copyright Clearance Center (<a href="http://www.copyright.com">http://www.copyright.com</a>)<br/> 222 Rosewood Drive<br/> Danvers, MA 01923<br/> Phone: 978-750-8400<br/> Fax: 978-750-4770<br/> Email: <a href="mailto:info@copyright.com">info@copyright.com</a> (<a href="mailto:info@copyright.com">mailto:info@copyright.com</a>)</p> <p>Authorization to photocopy items for the internal or personal use of specific clients is granted by the National Academy of Sciences provided that the proper fee is paid directly to CCC.</p> <p>[08/16]</p> |                                                                                                                       |
